# Supplementary material for: Analysis of QTLs on heading date based on single segment substitution lines in rice (Oryza Sativa L.)
Source: PubMed Central journal article supplement (PMC6125461; doi:10.1038/s41598-018-31377-7), 2018-09-05
Supplement: 41598_2018_31377_MOESM1_ESM.pdf [file 41598_2018_31377_MOESM1_ESM.pdf]

# **Analysis of QTLs on heading date based on single segment substitution lines in rice (*Oryza Sativa* L.)**

Haitao Zhu<sup>1#</sup>, Yun Li<sup>1,2#</sup>, Jiayan Liang<sup>1#</sup>, Xin Luan<sup>1</sup>, Pan Xu<sup>3</sup>, Shaokui Wang<sup>1\*</sup>, Guiquan Zhang<sup>1\*</sup>,  
Guifu Liu<sup>1\*</sup>

<sup>1</sup> Guangdong Key Lab of Plant Molecular Breeding, South China Agricultural University, Guangzhou  
510642, P. R. China

<sup>2</sup> Shenzhen Agricultural Science and Technology Promotion Center, Shenzhen 518055, P. R. China

<sup>3</sup> College of Computational Science, Zhongkai University of Agriculture and Engineering, Guangzhou  
510225, P. R. China

\* Co-corresponding authors: Shaokui Wang, Guiquan Zhang and Guifu Liu

# Haitao Zhu, Yun Li and Jiayan Liang contributed equally to this work.

Phone: +86-20-85288311

Fax: +86-20-85288311

E-mail: [guifuliu@scau.edu.cn](mailto:guifuliu@scau.edu.cn)

## SUPPLEMENTARY MATERIALS

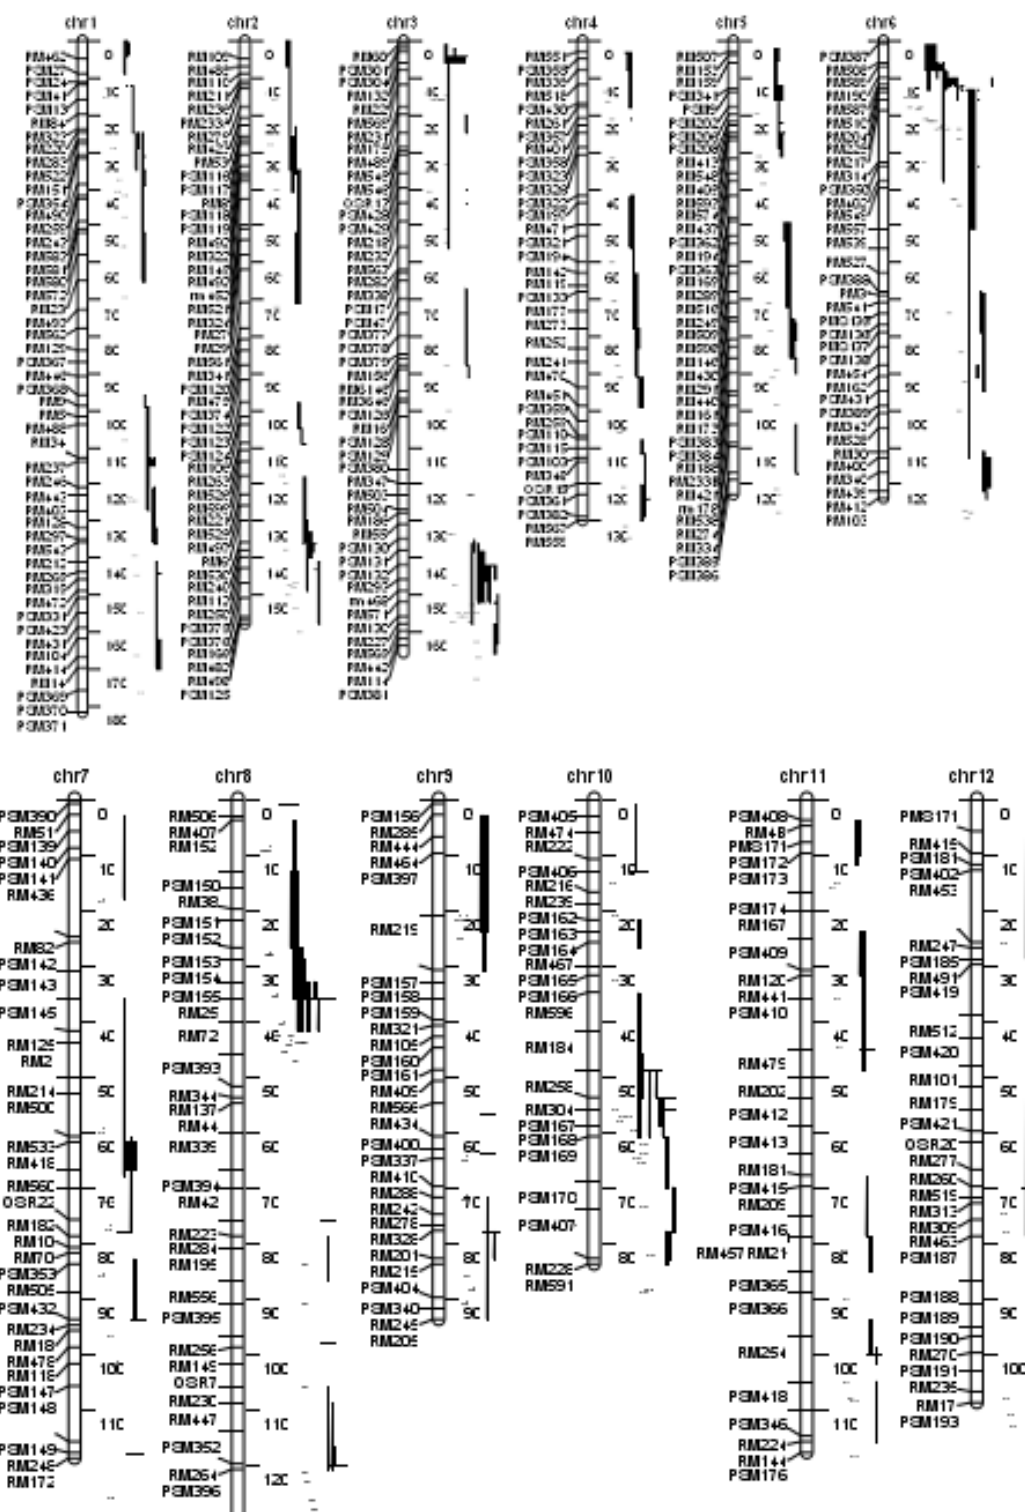

FIGURE S1 Distributions of single segments on the chromosomes (chr). Chr was the abbreviation of chromosome. Markers and genetic positions (cM) appeared at the left and the right of chromosomes, respectively. Points or vertical lines at the right of chromosomes represented substitution segments.

TABLE S1 Phenotypic values and effect values on heading date (hd) for Hua-jing-xian 74 (HJX74) and 202 single segment substitution lines (SSSLs) in the two cropping seasons (days)

| SSSL <sup>a</sup> | hd1    | hd2   | effect1           | effect2 <sup>b</sup> | SSSL  | hd1    | hd2   | effect1  | effect2 |
|-------------------|--------|-------|-------------------|----------------------|-------|--------|-------|----------|---------|
| HJX74             | 103.9  | 71    |                   |                      |       |        |       |          |         |
| s1-1              | 101.9  | 73.85 | -2.0 <sup>c</sup> | 2.85 * <sup>d</sup>  | s6-4  | 104.15 | 68.8  | 0.25     | -2.2    |
| s1-2              | 103.75 | 73.1  | -0.15             | 2.1                  | s6-5  | 109.95 | 75.55 | 6.05 **  | 4.55 ** |
| s1-3              | 102.8  | 69.65 | -1.1              | -1.35                | s6-6  | 102.5  | 70.2  | -1.4     | -0.8    |
| s1-4              | 102    | 70.4  | -1.9              | -0.6                 | s6-7  | 126.65 | -     | 22.75 ** |         |
| s1-5              | 103.9  | 72.45 | 0                 | 1.45                 | s6-8  | 101.75 | 69.65 | -2.15    | -1.35   |
| s1-6              | 102.55 | 68.25 | -1.35             | -2.75 *              | s6-9  | 125.55 | -     | 21.65 ** |         |
| s1-7              | 102.8  | 72.15 | -1.1              | 1.15                 | s6-10 | 124.45 | -     | 20.55 ** |         |
| s1-8              | 100    | 67.4  | -3.9 **           | -3.6 **              | s6-11 | 121.85 | 90.9  | 17.95 ** | 19.9 ** |
| s1-9              | 99.6   | 70.35 | -4.3 **           | -0.65                | s6-12 | 118.9  | 92.6  | 15 **    | 21.6 ** |
| s1-10             | 99.95  | 67.25 | -3.95 **          | -3.75 **             | s6-13 | 101.95 | 70.95 | -1.95    | -0.05   |
| s1-11             | 102.75 | 69.05 | -1.15             | -1.95                | s6-14 | 123.45 | 79.2  | 19.55 ** | 8.2 **  |
| s1-12             | 105.65 | 71.1  | 1.75              | 0.1                  | s6-15 | 104.4  | 71.45 | 0.5      | 0.45    |
| s1-13             | 101.6  | 70.3  | -2.3              | -0.7                 | s6-16 | 101.9  | 71    | -2       | 0       |
| s1-14             | 101.7  | 69.95 | -2.2              | -1.05                | s6-17 | 109.85 | 77.7  | 5.95 **  | 6.7 **  |
| s1-15             | 99.6   | 68.55 | -4.3 **           | -2.45                | s6-18 | 104.1  | 71.8  | 0.2      | 0.8     |
| s1-16             | 105.45 | 71.9  | 1.55              | 0.9                  | s6-19 | 102.55 | 68.9  | -1.35    | -2.1    |
| s1-17             | 100.6  | 68.85 | -3.3 *            | -2.15                | s6-20 | 107.9  | 72.8  | 4 **     | 1.8     |
| s1-18             | 104.4  | 73.4  | 0.5               | 2.4                  | s6-21 | 101.55 | 69.45 | -2.35    | -1.55   |
| s1-19             | 103.65 | 72.65 | -0.25             | 1.65                 | s6-22 | 100.05 | 68.7  | -3.85 ** | -2.3    |
| s1-20             | 104.55 | 73.85 | 0.65              | 2.85 *               | s6-23 | 101.2  | 69.15 | -2.7 *   | -1.85   |
| s2-1              | 101.35 | 70.75 | -2.55             | -0.25                | s6-24 | 108.2  | 75.3  | 4.3 **   | 4.3 **  |
| s2-2              | 99     | 69.65 | -4.9 **           | -1.35                | s6-25 | 107.85 | 74.7  | 3.95 **  | 3.7 **  |
| s2-3              | 101.8  | 72.15 | -2.1              | 1.15                 | s6-26 | 104.25 | 71.6  | 0.35     | 0.6     |
| s2-4              | 103.1  | 70    | -0.8              | -1                   | s6-27 | 103.9  | 70.55 | 0        | -0.45   |
| s2-5              | 102.05 | 69.35 | -1.85             | -1.65                | s6-28 | 101.75 | 70.65 | -2.15    | -0.35   |
| s2-6              | 100.35 | 71.7  | -3.55 *           | 0.7                  | s6-29 | 111.1  | 70.5  | 7.2 **   | -0.5    |
| s2-7              | 99.4   | 68.9  | -4.5 **           | -2.1                 | s7-1  | 100.3  | 68.15 | -3.6 **  | -2.85 * |
| s2-8              | 99.55  | 68.15 | -4.35 **          | -2.85 *              | s7-2  | 101.25 | 70.95 | -2.65    | -0.05   |
| s2-9              | 103.85 | 71.65 | -0.05             | 0.65                 | s7-3  | 102.5  | 69.85 | -1.4     | -1.15   |
| s2-10             | 104.45 | 69.35 | 0.55              | -1.65                | s7-4  | 110.2  | 74.1  | 6.3 **   | 3.1 *   |
| s2-11             | 99.7   | 68.4  | -4.2 **           | -2.6 *               | s7-5  | 100.8  | 70.95 | -3.1 *   | -0.05   |
| s2-12             | 100.15 | 64.95 | -3.75 **          | -6.05 **             | s7-6  | 102.65 | 71.1  | -1.25    | 0.1     |
| s2-13             | 98.25  | 62.45 | -5.65 **          | -8.55 **             | s7-7  | 107.55 | 75.6  | 3.65 **  | 4.6 **  |
| s2-14             | 100.4  | 67.8  | -3.5 *            | -3.2 *               | s7-8  | 105.25 | 71.3  | 1.35     | 0.3     |
| s2-15             | 100.9  | 73.2  | -3 *              | 2.2                  | s7-9  | 103.1  | 73.05 | -0.8     | 2.05    |
| s2-16             | 95.25  | 66.2  | -8.65 **          | -4.8 **              | s8-1  | 108.55 | 73.65 | 4.65 **  | 2.65 *  |

|       |        |       |        |    |        |    |        |        |       |       |    |       |    |
|-------|--------|-------|--------|----|--------|----|--------|--------|-------|-------|----|-------|----|
| s2-17 | 109.65 | 72.2  | 5.75   | ** | 1.2    |    | s8-2   | 100.45 | 70.3  | -3.45 | ** | -0.7  |    |
| s2-18 | 103.3  | 72.05 | -0.6   |    | 1.05   |    | s8-3   | 105.8  | 72.35 | 1.9   |    | 1.35  |    |
| s2-19 | 103.2  | 72.2  | -0.7   |    | 1.2    |    | s8-4   | 118.7  | 79.4  | 14.8  | ** | 8.4   | ** |
| s2-20 | 103.35 | 72.1  | -0.55  |    | 1.1    |    | s8-5   | 119.7  | 79.1  | 15.8  | ** | 8.1   | ** |
| s3-1  | 88.35  | 64.15 | -15.55 | ** | -6.85  | ** | s8-6   | 121.5  | 80.25 | 17.6  | ** | 9.25  | ** |
| s3-2  | 97.8   | 62.95 | -6.1   | ** | -8.05  | ** | s8-7   | 114.6  | 76.3  | 10.7  | ** | 5.3   | ** |
| s3-3  | 83.3   | 53.75 | -20.6  | ** | -17.25 | ** | s8-8   | 120.9  | 79.05 | 17    | ** | 8.05  | ** |
| s3-4  | 92.5   | 65.1  | -11.4  | ** | -5.9   | ** | s8-9   | 124.2  | 81.65 | 20.3  | ** | 10.65 | ** |
| s3-5  | 96.8   | 63.95 | -7.1   | ** | -7.05  | ** | s8-10  | 120.95 | 79.9  | 17.05 | ** | 8.9   | ** |
| s3-6  | 97.75  | 67.4  | -6.15  | ** | -3.6   | ** | s8-11  | 121.3  | 77.45 | 17.4  | ** | 6.45  | ** |
| s3-7  | 96.9   | 62.7  | -7     | ** | -8.3   | ** | s8-12  | 122.2  | 79.7  | 18.3  | ** | 8.7   | ** |
| s3-8  | 91.3   | 63.9  | -12.6  | ** | -7.1   | ** | s8-13  | 124.7  | -     | 20.8  | ** |       |    |
| s3-9  | 100.8  | 70.8  | -3.1   | *  | -0.2   |    | s8-14  | 115.1  | 84.9  | 11.2  | ** | 13.9  | ** |
| s3-10 | 103.05 | 71.15 | -0.85  |    | 0.15   |    | s8-15  | 101.45 | 67.65 | -2.45 |    | -3.35 | *  |
| s3-11 | 102.2  | 70.9  | -1.7   |    | -0.1   |    | s8-16  | 102.2  | 72.5  | -1.7  |    | 1.5   |    |
| s3-12 | 103.4  | 69.4  | -0.5   |    | -1.6   |    | s8-17  | 102.15 | 70.2  | -1.75 |    | -0.8  |    |
| s3-13 | 101.25 | 68.95 | -2.65  |    | -2.05  |    | s8-18  | 102.9  | 69.15 | -1    |    | -1.85 |    |
| s3-14 | 100.55 | 70.3  | -3.35  | ** | -0.7   |    | s8-19  | 106.8  | 73.15 | 2.9   | *  | 2.15  |    |
| s3-15 | 101.6  | 70.4  | -2.3   |    | -0.6   |    | s8-20  | 111.1  | 70.45 | 7.2   | ** | -0.55 |    |
| s3-16 | 97.25  | 65.85 | -6.65  | ** | -5.15  | ** | s8-21  | 103.15 | 71.05 | -0.75 |    | 0.05  |    |
| s3-17 | 104.75 | 68.9  | 0.85   |    | -2.1   |    | s8-22  | 99.1   | 65.2  | -4.8  | ** | -5.8  | ** |
| s3-18 | 101.95 | 68.4  | -1.95  |    | -2.6   | *  | s9-1   | 104.25 | 72    | 0.35  |    | 1     |    |
| s3-19 | 103.05 | 68.9  | -0.85  |    | -2.1   |    | s9-2   | 102.05 | 71.95 | -1.85 |    | 0.95  |    |
| s3-20 | 102.55 | 69    | -1.35  |    | -2     |    | s9-3   | 103.4  | 71.5  | -0.5  |    | 0.5   |    |
| s3-21 | 101.85 | 70.85 | -2.05  |    | -0.15  |    | s9-4   | 101.15 | 69.3  | -2.75 | *  | -1.7  |    |
| s3-22 | 97.5   | 70.45 | -6.4   | ** | -0.55  |    | s9-5   | 104.6  | 69.85 | 0.7   |    | -1.15 |    |
| s3-23 | 100.5  | 70.05 | -3.4   | *  | -0.95  |    | s9-6   | 100.4  | 69.5  | -3.5  | *  | -1.5  |    |
| s3-24 | 101    | 71.6  | -2.9   | *  | 0.6    |    | s9-7   | 101.9  | 70.55 | -2    |    | -0.45 |    |
| s3-25 | 101.8  | 68.9  | -2.1   |    | -2.1   |    | s9-8   | 104.65 | 70.7  | 0.75  |    | -0.3  |    |
| s3-26 | 103.75 | 72    | -0.15  |    | 1      |    | s9-9   | 104.75 | 71    | 0.85  |    | 0     |    |
| s3-27 | 99.95  | 63.9  | -3.95  | ** | -7.1   | ** | s10-1  | 102.7  | 70.25 | -1.2  |    | -0.75 |    |
| s4-1  | 102.55 | 70.85 | -1.35  |    | -0.15  |    | s10-2  | 101.85 | 69.5  | -2.05 |    | -1.5  |    |
| s4-2  | 102.65 | 68.15 | -1.25  |    | -2.85  | *  | s10-3  | 110.9  | 72.8  | 7     | ** | 1.8   |    |
| s4-3  | 107.45 | 70.55 | 3.55   | *  | -0.45  |    | s10-4  | 108.3  | 73.75 | 4.4   | ** | 2.75  | *  |
| s4-4  | 103.35 | 70.9  | -0.55  |    | -0.1   |    | s10-5  | 106.15 | 71.5  | 2.25  |    | 0.5   |    |
| s4-5  | 106.75 | 71.1  | 2.85   | *  | 0.1    |    | s10-6  | 103.4  | 71    | -0.5  |    | 0     |    |
| s4-6  | 101.9  | 69.55 | -2     |    | -1.45  |    | s10-7  | 109.65 | -     | 5.75  | ** |       |    |
| s4-7  | 102.85 | 71.65 | -1.05  |    | 0.65   |    | s10-8  | 101.2  | 69.65 | -2.7  |    | -1.35 |    |
| s4-8  | 102.1  | 71.75 | -1.8   |    | 0.75   |    | s10-9  | 106.05 | 71.55 | 2.15  |    | 0.55  |    |
| s4-9  | 101.8  | 70.55 | -2.1   |    | -0.45  |    | s10-10 | 106.95 | 72.25 | 3.05  | *  | 1.25  |    |
| s4-10 | 104.3  | 70.1  | 0.4    |    | -0.9   |    | s10-11 | 109.1  | 74.8  | 5.2   | ** | 3.8   | ** |
| s4-11 | 105.1  | 68.8  | 1.2    |    | -2.2   |    | s10-12 | 110.15 | 74.05 | 6.25  | ** | 3.05  | *  |

|       |        |       |       |       |       |        |        |        |        |      |        |      |   |
|-------|--------|-------|-------|-------|-------|--------|--------|--------|--------|------|--------|------|---|
| s4-12 | 105.95 | 71.05 | 2.05  | 0.05  |       | s10-13 | 107.15 | 71.35  | 3.25   | *    | 0.35   |      |   |
| s4-13 | -      | 79.45 |       | 8.45  | **    | s10-14 | 104.2  | 72.9   | 0.3    |      | 1.9    |      |   |
| s4-14 | 101.6  | 69.35 | -2.3  | -1.65 |       | s10-15 | 107.8  | 74.8   | 3.9    | **   | 3.8    | **   |   |
| s4-15 | 107.1  | 71.5  | 3.2   | *     | 0.5   | s10-16 | 104.15 | 71.8   | 0.25   |      | 0.8    |      |   |
| s5-1  | 103.25 | 69.25 | -0.65 | -1.75 |       | s10-17 | 105.15 | 71.9   | 1.25   |      | 0.9    |      |   |
| s5-2  | 102.55 | 68.35 | -1.35 | -2.65 | *     | s11-1  | 88.65  | 60.95  | -15.25 | **   | -10.05 | **   |   |
| s5-3  | 102.5  | 64.6  | -1.4  | -6.4  | **    | s11-2  | 102.8  | 70.35  | -1.1   |      | -0.65  |      |   |
| s5-4  | 104.8  | 70    | 0.9   | -1    |       | s11-3  | 105.65 | 69.85  | 1.75   |      | -1.15  |      |   |
| s5-5  | 102.4  | 68.4  | -1.5  | -2.6  | *     | s11-4  | 106.05 | 71.7   | 2.15   |      | 0.7    |      |   |
| s5-6  | 101.65 | 70.2  | -2.25 | -0.8  |       | s11-5  | 106.7  | 71.15  | 2.8    | *    | 0.15   |      |   |
| s5-7  | 100.85 | 68.35 | -3.05 | *     | -2.65 | *      | s11-6  | 105.65 | 73.65  | 1.75 |        | 2.65 | * |
| s5-8  | 101.45 | 70    | -2.45 | -1    |       | s11-7  | 102.3  | 71.7   | -1.6   |      | 0.7    |      |   |
| s5-9  | 104.55 | 69.5  | 0.65  | -1.5  |       | s11-8  | 102.35 | 69.4   | -1.55  |      | -1.6   |      |   |
| s5-10 | 103.85 | 70.25 | -0.05 | -0.75 |       | s11-9  | 105.9  | 72.05  | 2      |      | 1.05   |      |   |
| s5-11 | 102.7  | 69.65 | -1.2  | -1.35 |       | s11-10 | 97     | 64.5   | -6.9   | **   | -6.5   | **   |   |
| s5-12 | 104.85 | 71.9  | 0.95  | 0.9   |       | s11-11 | 99.6   | 69.45  | -4.3   | **   | -1.55  |      |   |
| s5-13 | 106.35 | 73.05 | 2.45  | 2.05  |       | s12-1  | 101.25 | 68.85  | -2.65  |      | -2.15  |      |   |
| s5-14 | 102.8  | 71.3  | -1.1  | 0.3   |       | s12-2  | 102.95 | 68.5   | -0.95  |      | -2.5   |      |   |
| s5-15 | 102.1  | 71.1  | -1.8  | 0.1   |       | s12-3  | 104.25 | 70.7   | 0.35   |      | -0.3   |      |   |
| s5-16 | 102.95 | 71.35 | -0.95 | 0.35  |       | s12-4  | 103.8  | 69.4   | -0.1   |      | -1.6   |      |   |
| s6-1  | 102.6  | 69.95 | -1.3  | -1.05 |       | s12-5  | 100.85 | 70.85  | -3.05  | *    | -0.15  |      |   |
| s6-2  | 103.15 | 71.45 | -0.75 | 0.45  |       | s12-6  | 106.6  | 75.4   | 2.7    | *    | 4.4    | *    |   |
| s6-3  | 100.75 | 69.5  | -3.15 | *     | -1.5  | s12-7  | 100.8  | 69.7   | -3.1   | *    | -1.3   |      |   |

<sup>a</sup> si-j represented *jth* SSSL on chromosome i. <sup>b</sup> hd1 and effect1, hd2 and effect2 indicated the phenotypic values and effect values on HD for each SSSL in the spring and the fall, respectively. <sup>c</sup> The negative sign in the table indicated to shorten HD. <sup>d</sup> \* and \*\* showed the significance at P<0.05 and 0.01, respectively

Table S2 Data derived from the secondary F2 population from  $s3-3 \times HJX74$ 

| pos (cM) <sup>a</sup> |                 | 1.6                 | 3.9    | 5.5   | 6      | pos (cM) |    | 1.6    | 3.9    | 5.5   | 6      |
|-----------------------|-----------------|---------------------|--------|-------|--------|----------|----|--------|--------|-------|--------|
| ind.                  | hd <sup>b</sup> | RM3202 <sup>c</sup> | RM3894 | RM523 | RM3372 | ind.     | hd | RM3202 | RM3894 | RM523 | RM3372 |
| 1                     | 57              | 3 <sup>d</sup>      | 3      | 3     | 3      | 100      | 62 | 2      | 2      | 2     | 2      |
| 2                     | 58              | 2                   | 2      | 2     | 2      | 101      | 62 | 2      | 2      | 2     | 2      |
| 3                     | 58              | 3                   | 3      | 3     | 3      | 102      | 62 | 2      | 2      | 2     | 2      |
| 4                     | 58              | 3                   | 3      | 3     | 3      | 103      | 62 | 3      | 3      | 3     | 3      |
| 5                     | 58              | 3                   | 2      | 2     | 2      | 104      | 62 | 2      | 2      | 2     | 2      |
| 6                     | 58              | 2                   | 2      | 2     | 2      | 105      | 62 | 2      | 2      | 2     | 2      |
| 7                     | 58              | 2                   | 2      | 2     | 2      | 106      | 62 | 3      | 3      | 3     | 3      |
| 8                     | 59              | 2                   | 2      | 2     | 2      | 107      | 62 | 2      | 2      | 2     | 2      |
| 9                     | 59              | 3                   | 3      | 2     | 2      | 108      | 62 | 0      | 2      | 2     | 2      |
| 10                    | 59              | 3                   | 3      | 3     | 3      | 109      | 62 | 2      | 2      | 2     | 2      |
| 11                    | 59              | 3                   | 3      | 3     | 3      | 110      | 62 | 2      | 2      | 2     | 2      |
| 12                    | 59              | 2                   | 2      | 3     | 3      | 111      | 62 | 1      | 3      | 3     | 3      |
| 13                    | 59              | 2                   | 2      | 2     | 2      | 112      | 62 | 2      | 2      | 2     | 2      |
| 14                    | 59              | 2                   | 2      | 2     | 2      | 113      | 62 | 3      | 3      | 3     | 3      |
| 15                    | 59              | 2                   | 2      | 2     | 2      | 114      | 62 | 3      | 3      | 3     | 3      |
| 16                    | 59              | 3                   | 3      | 3     | 3      | 115      | 62 | 2      | 2      | 2     | 2      |
| 17                    | 59              | 2                   | 2      | 2     | 2      | 116      | 62 | 2      | 2      | 2     | 2      |
| 18                    | 60              | 3                   | 3      | 3     | 3      | 117      | 62 | 3      | 3      | 3     | 3      |
| 19                    | 60              | 3                   | 3      | 3     | 3      | 118      | 62 | 2      | 2      | 2     | 2      |
| 20                    | 60              | 3                   | 3      | 3     | 3      | 119      | 62 | 3      | 2      | 2     | 2      |
| 21                    | 60              | 2                   | 2      | 2     | 2      | 120      | 62 | 3      | 3      | 3     | 3      |
| 22                    | 60              | 2                   | 2      | 2     | 2      | 121      | 62 | 3      | 3      | 3     | 3      |
| 23                    | 60              | 2                   | 2      | 2     | 2      | 122      | 62 | 0      | 2      | 2     | 2      |
| 24                    | 60              | 3                   | 3      | 3     | 3      | 123      | 62 | 2      | 2      | 3     | 3      |
| 25                    | 60              | 2                   | 2      | 2     | 2      | 124      | 62 | 2      | 2      | 2     | 2      |
| 26                    | 60              | 2                   | 2      | 2     | 2      | 125      | 63 | 2      | 2      | 2     | 2      |
| 27                    | 60              | 1                   | 1      | 1     | 1      | 126      | 63 | 3      | 3      | 3     | 3      |
| 28                    | 60              | 2                   | 2      | 2     | 2      | 127      | 63 | 2      | 2      | 2     | 2      |
| 29                    | 60              | 2                   | 2      | 2     | 2      | 128      | 63 | 0      | 2      | 2     | 2      |
| 30                    | 60              | 3                   | 3      | 3     | 3      | 129      | 63 | 2      | 2      | 2     | 2      |
| 31                    | 60              | 3                   | 3      | 3     | 3      | 130      | 63 | 2      | 2      | 2     | 2      |
| 32                    | 60              | 2                   | 2      | 2     | 2      | 131      | 63 | 2      | 2      | 2     | 2      |
| 33                    | 60              | 3                   | 3      | 3     | 3      | 132      | 63 | 2      | 2      | 2     | 2      |
| 34                    | 60              | 3                   | 3      | 3     | 3      | 133      | 63 | 2      | 2      | 2     | 2      |
| 35                    | 60              | 1                   | 1      | 1     | 1      | 134      | 63 | 2      | 2      | 2     | 2      |
| 36                    | 60              | 2                   | 2      | 2     | 2      | 135      | 63 | 3      | 3      | 3     | 3      |

|    |    |   |   |   |   |     |    |   |   |   |   |
|----|----|---|---|---|---|-----|----|---|---|---|---|
| 37 | 60 | 3 | 3 | 3 | 3 | 136 | 63 | 0 | 2 | 2 | 2 |
| 38 | 60 | 2 | 2 | 2 | 2 | 137 | 63 | 2 | 2 | 2 | 2 |
| 39 | 60 | 2 | 2 | 2 | 2 | 138 | 64 | 2 | 2 | 2 | 2 |
| 40 | 60 | 2 | 2 | 2 | 2 | 139 | 64 | 2 | 2 | 2 | 2 |
| 41 | 60 | 1 | 2 | 2 | 2 | 140 | 64 | 2 | 2 | 2 | 2 |
| 42 | 60 | 2 | 2 | 2 | 2 | 141 | 64 | 2 | 2 | 2 | 2 |
| 43 | 60 | 3 | 3 | 3 | 3 | 142 | 64 | 2 | 2 | 2 | 2 |
| 44 | 60 | 3 | 3 | 3 | 3 | 143 | 64 | 2 | 2 | 2 | 2 |
| 45 | 60 | 2 | 2 | 2 | 2 | 144 | 64 | 2 | 2 | 2 | 2 |
| 46 | 60 | 2 | 2 | 2 | 2 | 145 | 64 | 2 | 2 | 2 | 2 |
| 47 | 60 | 1 | 1 | 1 | 1 | 146 | 65 | 2 | 2 | 2 | 2 |
| 48 | 60 | 3 | 3 | 3 | 3 | 147 | 65 | 2 | 2 | 2 | 3 |
| 49 | 60 | 2 | 2 | 2 | 2 | 148 | 65 | 2 | 2 | 2 | 2 |
| 50 | 60 | 2 | 2 | 2 | 2 | 149 | 65 | 2 | 2 | 2 | 2 |
| 51 | 60 | 2 | 2 | 2 | 2 | 150 | 65 | 2 | 2 | 2 | 2 |
| 52 | 60 | 2 | 2 | 2 | 2 | 151 | 65 | 2 | 2 | 2 | 2 |
| 53 | 60 | 0 | 3 | 3 | 3 | 152 | 65 | 2 | 2 | 2 | 2 |
| 54 | 60 | 3 | 3 | 3 | 3 | 153 | 65 | 2 | 2 | 2 | 2 |
| 55 | 60 | 2 | 2 | 2 | 2 | 154 | 65 | 3 | 3 | 3 | 3 |
| 56 | 60 | 3 | 3 | 3 | 3 | 155 | 65 | 2 | 2 | 2 | 2 |
| 57 | 60 | 2 | 2 | 2 | 2 | 156 | 66 | 2 | 2 | 2 | 2 |
| 58 | 60 | 3 | 3 | 3 | 3 | 157 | 66 | 2 | 2 | 2 | 2 |
| 59 | 60 | 3 | 3 | 3 | 3 | 158 | 70 | 1 | 1 | 1 | 1 |
| 60 | 61 | 2 | 2 | 2 | 2 | 159 | 70 | 1 | 1 | 0 | 1 |
| 61 | 61 | 2 | 2 | 2 | 2 | 160 | 70 | 0 | 1 | 1 | 1 |
| 62 | 61 | 3 | 3 | 3 | 3 | 161 | 70 | 0 | 1 | 1 | 1 |
| 63 | 61 | 2 | 2 | 2 | 2 | 162 | 71 | 1 | 1 | 1 | 1 |
| 64 | 61 | 3 | 3 | 3 | 3 | 163 | 71 | 1 | 1 | 1 | 1 |
| 65 | 61 | 3 | 3 | 3 | 3 | 164 | 71 | 1 | 1 | 1 | 1 |
| 66 | 61 | 3 | 3 | 3 | 3 | 165 | 71 | 1 | 1 | 1 | 1 |
| 67 | 61 | 2 | 2 | 2 | 2 | 166 | 71 | 1 | 1 | 1 | 2 |
| 68 | 61 | 1 | 2 | 2 | 2 | 167 | 71 | 1 | 1 | 1 | 1 |
| 69 | 61 | 2 | 2 | 2 | 2 | 168 | 71 | 1 | 1 | 1 | 1 |
| 70 | 61 | 2 | 2 | 2 | 2 | 169 | 72 | 1 | 1 | 1 | 1 |
| 71 | 61 | 2 | 2 | 2 | 2 | 170 | 72 | 1 | 1 | 1 | 1 |
| 72 | 61 | 2 | 2 | 2 | 2 | 171 | 72 | 1 | 1 | 1 | 1 |
| 73 | 61 | 2 | 2 | 2 | 2 | 172 | 72 | 1 | 1 | 1 | 1 |
| 74 | 61 | 3 | 3 | 3 | 3 | 173 | 72 | 1 | 1 | 1 | 1 |
| 75 | 61 | 2 | 2 | 2 | 2 | 174 | 73 | 1 | 1 | 1 | 2 |
| 76 | 61 | 3 | 3 | 3 | 3 | 175 | 73 | 1 | 1 | 1 | 1 |

|    |    |   |   |   |   |     |    |   |   |   |   |
|----|----|---|---|---|---|-----|----|---|---|---|---|
| 77 | 61 | 2 | 2 | 2 | 2 | 176 | 73 | 1 | 1 | 1 | 1 |
| 78 | 61 | 2 | 2 | 2 | 2 | 177 | 73 | 1 | 1 | 1 | 1 |
| 79 | 61 | 3 | 3 | 3 | 3 | 178 | 73 | 2 | 1 | 1 | 1 |
| 80 | 61 | 2 | 2 | 2 | 2 | 179 | 73 | 1 | 1 | 1 | 1 |
| 81 | 61 | 2 | 2 | 2 | 2 | 180 | 73 | 1 | 1 | 1 | 1 |
| 82 | 61 | 2 | 2 | 2 | 2 | 181 | 73 | 2 | 1 | 1 | 1 |
| 83 | 61 | 2 | 2 | 2 | 2 | 182 | 73 | 2 | 1 | 1 | 1 |
| 84 | 61 | 2 | 2 | 2 | 2 | 183 | 73 | 1 | 1 | 1 | 1 |
| 85 | 61 | 2 | 2 | 2 | 2 | 184 | 74 | 1 | 1 | 1 | 1 |
| 86 | 62 | 2 | 2 | 2 | 2 | 185 | 74 | 1 | 1 | 1 | 1 |
| 87 | 62 | 3 | 3 | 3 | 3 | 186 | 74 | 1 | 1 | 1 | 1 |
| 88 | 62 | 2 | 2 | 2 | 2 | 187 | 74 | 1 | 1 | 1 | 1 |
| 89 | 62 | 2 | 2 | 2 | 2 | 188 | 74 | 1 | 1 | 1 | 1 |
| 90 | 62 | 2 | 2 | 2 | 2 | 189 | 74 | 1 | 1 | 1 | 1 |
| 91 | 62 | 3 | 3 | 3 | 3 | 190 | 75 | 1 | 1 | 1 | 1 |
| 92 | 62 | 0 | 2 | 2 | 2 | 191 | 75 | 1 | 1 | 1 | 1 |
| 93 | 62 | 3 | 3 | 3 | 3 | 192 | 75 | 1 | 1 | 1 | 1 |
| 94 | 62 | 2 | 2 | 2 | 2 | 193 | 75 | 1 | 1 | 1 | 1 |
| 95 | 62 | 2 | 2 | 2 | 2 | 194 | 76 | 1 | 1 | 1 | 1 |
| 96 | 62 | 3 | 2 | 2 | 1 | 195 | 76 | 1 | 1 | 1 | 1 |
| 97 | 62 | 2 | 2 | 2 | 1 | 196 | 77 | 1 | 1 | 1 | 1 |
| 98 | 62 | 2 | 2 | 2 | 2 | 197 | 77 | 1 | 1 | 1 | 1 |
| 99 | 62 | 3 | 3 | 3 | 3 |     |    |   |   |   |   |

<sup>a</sup> Pos(cM) indicated the positions of markers on chromosomes. <sup>b</sup> ind. and hd represented the serial order and heading date, respectively. <sup>c</sup> Four SSR markers were named as RM3202, RM3894, RM523 and RM3372, respectively. <sup>d</sup> The numbers 1, 2 and 3 represented the genotypes of female parents, heterozygotes and male parents for each marker respectively, and 0 was absent.
